# Supplementary material for: Relationship between Diet Quality and Maternal Stool Microbiota in the MUMS Australian Pregnancy Cohort
Source: MDPI journal article supplement (doi:10.3390/nu15030689), 2023-01-30
Supplement: s1 [file s1]

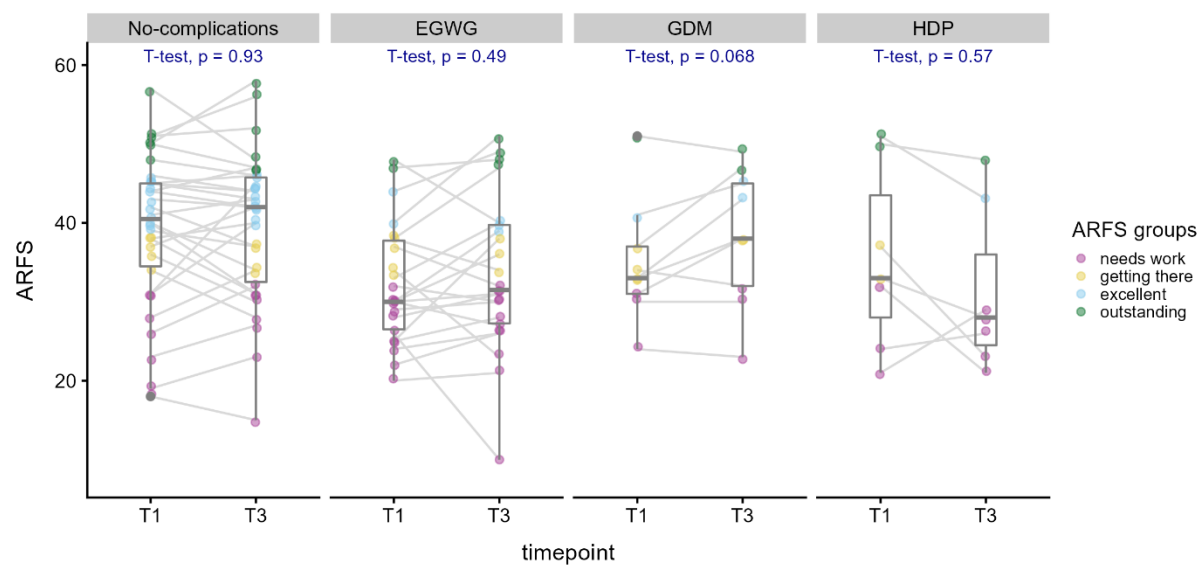

Supplementary Figure S1. Change in diet quality from Trimester 1 to Trimester 3 in MUMS participants with and without various pregnancy complications

Abbreviations: ARFS, Australian recommended food score; EGWG, excessive gestational weight gain; GDM, gestational diabetes; HDP, hypertensive disorder of pregnancy

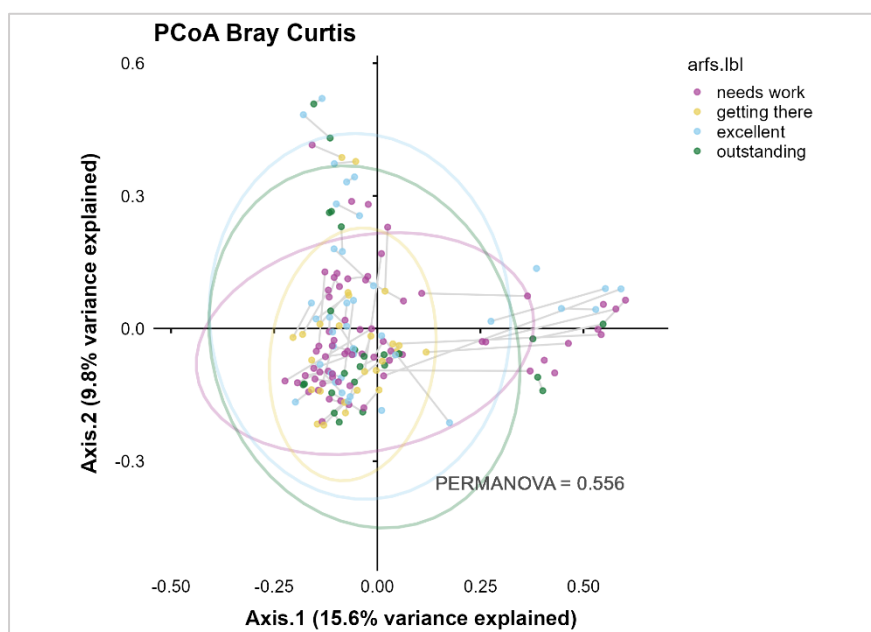

Supplementary Figure S2. Beta diversity between Australian Recommended Food Score diet quality groups
